# Supplementary material for: Piperidine-induced Switching of the direct band gaps of Ag(i)/Bi(iii) bimetallic iodide double perovskites
Source: Royal Society of Chemistry journal article supplement (doi:10.1039/d0tc01017k), 2020-01-01
Supplement: d0tc01017k1.pdf [file d0tc01017k1.pdf]

*Supporting Information for*

**Piperidine Switches on Direct Band Gaps of Ag(I)/Bi(III)  
Bimetallic Iodide Double Perovskites**

*Mohamed Saber Lassoued,<sup>a</sup> Le-Yu Bi,<sup>a</sup> Zhaoxin Wu,<sup>b,c</sup> Guijiang Zhou,<sup>d</sup> and Yan-Zhen Zheng\*<sup>a</sup>*

---

**a** *M. S. Lassoued, L.-Y. Bi, Y.-Z. Zheng*

*Frontier Institute of Science and Technology (FIST), State Key Laboratory for Mechanical Behavior of Materials, MOE Key Laboratory for Nonequilibrium Synthesis and Modulation of Condensed Matter, Xi'an Key Laboratory of Sustainable Energy and Materials Chemistry, and School of Science, Xi'an Jiaotong University, Xi'an 710049, China.  
E-mail: [zheng.yanzhen@xjtu.edu.cn](mailto:zheng.yanzhen@xjtu.edu.cn)*

**b,c** *Z. Wu*

*Key Laboratory of Photonics Technology for Information, Key Laboratory for Physical Electronics and Devices of the Ministry of Education, Department of Electronic Science and Technology, School of Electronic and Information Engineering, Xi'an Jiaotong University, Xi'an, China d. Collaborative Innovation Center of Extreme Optics, Shanxi University, Taiyuan 030006, China.*

**d** *G. Zhou*

*Ministry of Education Key Laboratory for Nonequilibrium Synthesis and Modulation of Condensed Matter and Department of Chemistry, Faculty of Science, Xi'an Jiao Tong University, Xi'an 710049, P. R. China*

## **Table of Contents**

### **1. Experimental Section**

*1.1. General remarks*

### **2. Materials and Sample Preparation**

*2.1. Materials*

*2.2. Preparation of  $(AMP)_4[BiAgI_8]_2 \cdot H_2O$  and  $(APP)_4[BiAgI_8] \cdot H_2O$  Single crystals*

*2.3. Fabrication of  $(AMP)_4[BiAgI_8]_2 \cdot H_2O$  and  $(APP)_4[BiAgI_8] \cdot H_2O$  Thin Films*

### **3. Characterization methods and Simulation details**

*3.1. Characterization methods*

*3.2. Simulation details*

### **4. Supporting Tables and Figures**

## 1. Experimental Section

### 1.1. General remarks

Single crystal X-ray diffraction data of **1** and **2** were recorded on a Bruker detector diffractometer with graphite monochromated MoK radiation ( $\lambda = 0.71073 \text{ \AA}$ ) at 150K. PXRD intensities were measured at room temperature on a Rigaku D/max-III A diffractometer (Cu- $k\lambda$ ,  $\lambda = 1.54056 \text{ \AA}$ ). The crystalline powder samples were prepared by grinding the single crystals and collected in the  $2\theta$  range of 5 to  $50^\circ$  at a rate of  $10^\circ/\text{min}$  to determine the purity and the phase identity. TGA experiments were performed on a TGA-50 (SHIMADZU) thermogravimetric analyzer. The ac impedance spectroscopies were conducted on the Metrohm Autolab B.V. PGSTAT204 in the frequency range from 1 to 1 MHz with amplitude of 50 mV and in a humidity range of 30% to 90% at  $95^\circ\text{C}$ . Scanning electron microscopy (SEM) was performed using KYKY-EM3200, 25 KV instrument. Solid-state UV-Vis diffusion reflectance spectra of pressed powder samples were measured on a SHIMADZU UV-3600 UV-Vis-NIR spectrophotometer using  $\text{BaSO}_4$  powder as the reflectance reference. Room-temperature steady-state emission spectra were collected on powder samples using an Edinburgh FLS9 fluorimeter upon 450 nm excitation. All density-functional theory (DFT) calculations were carried out within the Materials Studio. The Photo response measurement was calculated using a picoammeter (Keithley 6485) in series with a source meter (Keithley 2400) to detect the small current in this test. A 350 W solar-simulating Xenon lamp was used as light source.

## 2. Materials and Sample Preparation

### 2.1. Materials

Chemicals listed were used as purchased and without further purification: (i) 4-aminomethylpiperidine, 98%, Alfa Aesar; (ii) 4-aminopiperidine, 98%, sigma Aldrich; (iii) hydroiodic acid, 57% w/w, sigma Aldrich; (iv) bismuth iodide, 99.9 %, sigma Aldrich; (v) silver iodide, 99%, Fisher Scientific

### 2.2. Preparation of $(\text{AMP})_4[\text{BiAgI}_8]_2 \cdot \text{H}_2\text{O}$ and $(\text{APP})_4[\text{BiAgI}_8] \cdot \text{H}_2\text{O}$ Single crystals

Red plate crystals of  $(\text{C}_6\text{H}_{16}\text{N}_2)_4[\text{BiAgI}_8]_2 \cdot \text{H}_2\text{O}$  (**1**) were synthesized from a reaction mixture containing 4-aminomethylpiperidine (0.456 g, 4 mmol),  $\text{BiI}_3$  (1.178 g, 2 mmol) and AgI (0.468 g, 2 mmol) in 15 mL of hydrogeniodide acid (HI, 57%), then the mixture was loaded into a 28 mL Teflon-lined stainless steel autoclave. The container was closed and heated at  $120^\circ\text{C}$  for

72 hours. At a rate of 5 °C/h, the system was allowed to cool to room temperature. The crystals of **1** were washed with diethyl ether and dried in vacuum (Yield: *ca.* 71% based on Bi).

Red needle crystals of  $(C_5H_{13}N_2)_4[BiAgI_8] \cdot H_2O$  (**2**) were obtained from a similar method. A mixture of 4-aminopyridine (0.4 g, 4 mmol),  $BiI_3$  (0.589 g, 1 mmol) and AgI (0.234 g, 1 mmol) were added to a 15 mL of HI (57%), then the reaction was heated at 120 °C for 3 days. The system was allowed to cool to room temperature at the rate of 5 °C/h. The crystals of **2** were washed with diethyl ether and dried in vacuum (Yield: *ca.* 78% based on Bi).

### 2.3. Fabrication of $(AMP)_4[BiAgI_8]_2 \cdot H_2O$ and $(APP)_4[BiAgI_8] \cdot H_2O$ Thin Films

$(AMP)_4[BiAgI_8]_2 \cdot H_2O$  and  $(APP)_4[BiAgI_8] \cdot H_2O$  perovskite compounds (0.4 g) were dissolved in 1 mL of DMF solution and were coated onto ITO glass substrate by spin coating technique at 1000 rpm for 60 second. To evaporate the residual solvent, the obtained film was followed by annealing on a hot plate at 70 °C for 10 minutes, visible color change from light red to dark red can be observed.

## 3. Characterization methods and Simulation details

### 3.1. Characterization methods

**X-ray Crystallographic Study** .The structures were solved by direct methods and refined with a full-matrix least-squares technique within the SHELXTL program package.[1] All non-hydrogen atoms were subjected to anisotropic refinement by full-matrix least-squares refinement on F2 using SHELXTL. The crystallographic details are provided in **Table S1–S5**. Crystallographic data for the structural analyses have been deposited at the Cambridge Crystallographic Data Centre. The crystallographic data for above compound can be found in the Supporting Information or can be obtained free of charge from the Cambridge Crystallographic Data Centre via [http://www.ccdc.cam.ac.uk/data\\_request/cif](http://www.ccdc.cam.ac.uk/data_request/cif). CCDC Numbers: 1975061 (**1**), 1975058 (**2**).

**Proton conductivity measurements.** The two sample were pressed into a cylinder pellet of crystalline powder sample by transferring to a standard 13 mm die and pressed with 15 MPa for 10 munites (13 mm diameter\* 0.5 mm to 1 mm thickness for **1** and **2**) coated with silver colloid. The pellet was connected to two Pt wires at both sides using conductive silver paste and then the four electrodes are linked to the two Pt wires. It's important to note that the silver paste must cover the measurement area (Scheme S1). The proton conductivity was estimated by semi circle fitting of Nyquist plots.

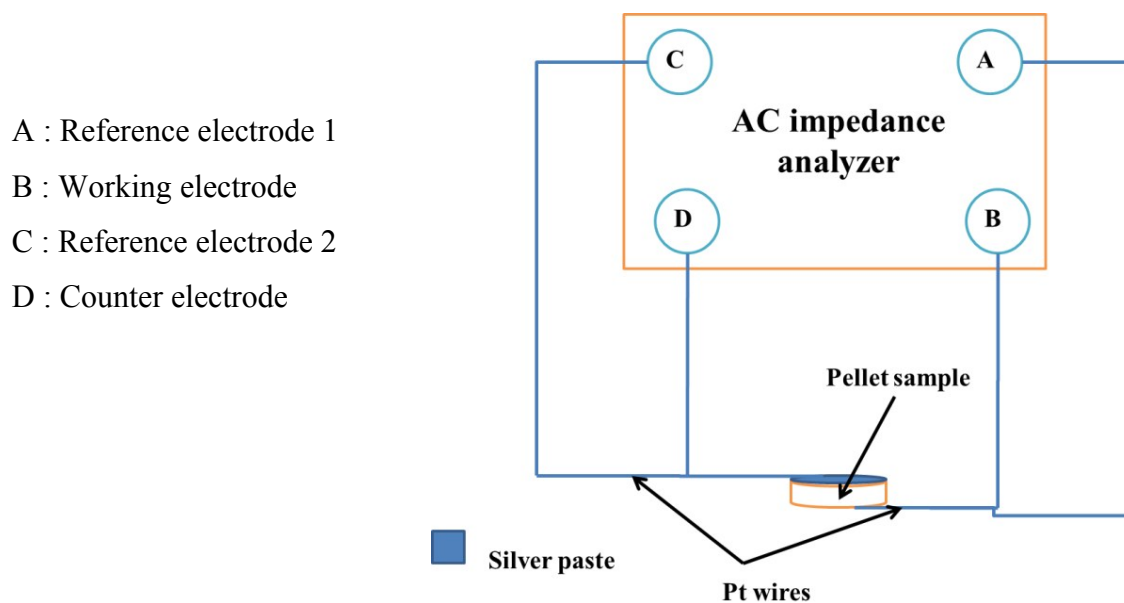

**Scheme S1.** A diagram showing quasi-four-probe method (also called two-probe method) for proton conductivity measurement.

**TG analysis.** TG analysis experiment of **1** and **2** polycrystalline powder were performed with a heating rate of  $10\text{ }^{\circ}\text{C min}^{-1}$  under  $\text{N}_2$  atmosphere from  $30$  to  $600\text{ }^{\circ}\text{C}$  under nitrogen gas atmosphere. The weight loss of these two compound began from  $290\text{ }^{\circ}\text{C}$  and  $285\text{ }^{\circ}\text{C}$  for **1** and **2** respectively due to the degradation of the organic part.

**UV-vis-NIR Diffuse Reflectance Spectroscopy.** The  $\text{BaSO}_4$  powder sample was used as a reference (100% reflectance) and Absorption (K/S) data were calculated from the following Kubelka-Munk function:  $K/S = (1-R)^2/2R$ , where R is the reflectance, K is the absorption, and S is the scattering.

**Photoluminescence measurement.** Room-temperature steady-state emission spectra were collected on powder samples upon  $450\text{ nm}$  excitation. The CIE chromaticity coordinates, CRI color rendering index and CCT correlated color temperatures were calculated using the OSRAM Company's Color Calculator software available from <https://www.osram-america.com>.

**Photo response measurement.** The pellets were prepared by grinding  $50\text{-}100\text{ mg}$  polycrystalline samples of **1** and **2** into a homogeneous powder after pressed with  $15\text{ MPa}$  for  $10$  minutes. Each pellet was connected to two wires at one side (up or down) using conductive silver paste. It's worthy to note that we left one narrow strip like area without paint which can receive light from the lamp. A  $350\text{ W}$  solar-simulating Xenon lamp was used as light source. For each  $40\text{ s}$  we past or blocked the light and detected the current change.

The on/off ratio of the photodetector is calculated using equation 1.

$$\text{ON /OFF} = I_{\text{light}} / I_{\text{dark}} \text{(1)}$$

Where  $I_{\text{light}}$  is the photocurrent (79.31 nA for **1** and 56.01 nA for **2**) and  $I_{\text{dark}}$  is the dark current (5.64 nA and 2.80 nA for **1** and **2** respectively).

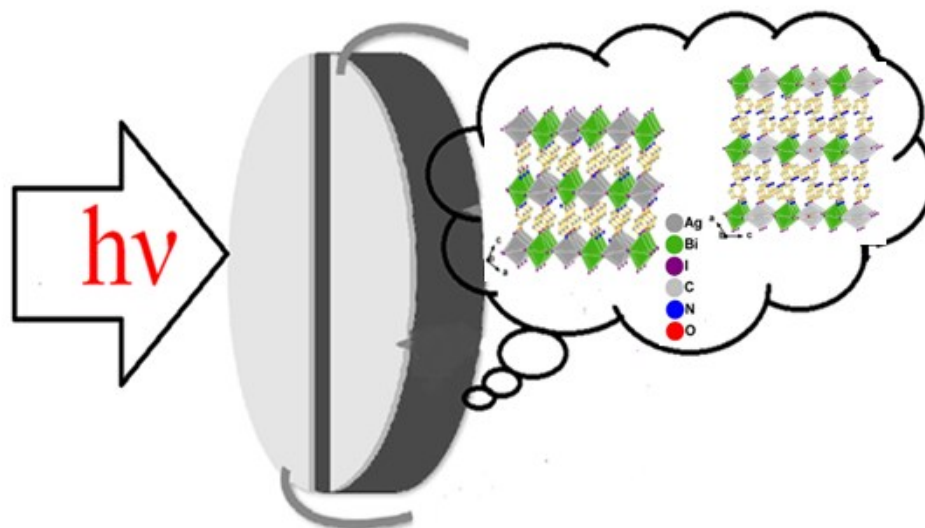

**Scheme S2.** Scheme of photo-response test device.

**Stability studies.** Freshly prepared powder samples and films of **1** and **2** were stored either in the dark to minimize light exposure and the relative humidity was maintained at ~55% humidity for 30 days.

### 3.2. Simulation details

The First-principles density functional theory (DFT) [2] calculations were performed in the framework of the CASTEP [3] (Cambridge Serial Total Energy Package) module of Materials Studio 2017 in an elastic compute server with 24 cores and 96 GB memory. The functional developed by Ceperley and Alder data as parameterized by Perdew and Zunger (CA-PZ) in the framework of the local density approximation (LDA) [4] form was adopted to describe the exchange correlation energy. The equilibrium crystal structures were achieved by utilizing geometry optimization. The convergence threshold for the self-consistent field was  $10^{-6}$  Ha. The other parameters and convergent criteria were the default values of CASTEP code. When excluding the spin orbit coupling (SOC), the kinetic energy cutoff we used was 260 eV with ultrasoft pseudopotentials. For the case of including the SOC, we applied norm-conserving pseudo potentials [5] in the Kleinman Bylander [6] form for all the elements were used to model the effective interaction between atom cores and valence electrons. With SOC, our approach

gives rather small difference between theory and experiment for lattice constants, and provides correct trends of band gap values and shows good experiment–theory agreement of gap values.

## 4. Supporting Tables and Figures

**Table S1** Summary of crystal data and structural refinements of **1** and **2**

|                                                           | <b>1</b>                                                                                                                  | <b>2</b>                                                                                                                 |
|-----------------------------------------------------------|---------------------------------------------------------------------------------------------------------------------------|--------------------------------------------------------------------------------------------------------------------------|
| CCDC number                                               | 1975061                                                                                                                   | 1975058                                                                                                                  |
| Empirical formula                                         | C <sub>24</sub> H <sub>66</sub> Bi <sub>2</sub> Ag <sub>2</sub> I <sub>16</sub> N <sub>8</sub> O                          | C <sub>20</sub> H <sub>54</sub> BiAgI <sub>8</sub> N <sub>8</sub> O                                                      |
| Formula weight                                            | 3146.95                                                                                                                   | 1754.76                                                                                                                  |
| Crystal dimensions (mm)                                   | 0.12*0.2*0.14                                                                                                             | 0.13*0.18*0.11                                                                                                           |
| Crystal system                                            | Monoclinic                                                                                                                | Monoclinic                                                                                                               |
| Space group                                               | C2/c                                                                                                                      | C2/c                                                                                                                     |
| <i>a</i> /Å                                               | 34.882(14)                                                                                                                | 32.576(9)                                                                                                                |
| <i>b</i> /Å                                               | 8.442(4)                                                                                                                  | 8.589(2)                                                                                                                 |
| <i>c</i> /Å                                               | 22.114(9)                                                                                                                 | 19.604(5)                                                                                                                |
| $\alpha$ /°                                               | 90                                                                                                                        | 90                                                                                                                       |
| $\beta$ /°                                                | 97.105(5)                                                                                                                 | 125.138(3)                                                                                                               |
| $\gamma$ /°                                               | 90                                                                                                                        | 90                                                                                                                       |
| Volume/Å <sup>3</sup>                                     | 6462(5)                                                                                                                   | 4486(2)                                                                                                                  |
| <i>Z</i>                                                  | 4                                                                                                                         | 4                                                                                                                        |
| $\rho$ calcg/cm <sup>3</sup>                              | 3.235                                                                                                                     | 2.598                                                                                                                    |
| $\mu$ /mm <sup>-1</sup>                                   | 13.699                                                                                                                    | 9.884                                                                                                                    |
| F(000)                                                    | 5528.0                                                                                                                    | 3168.0                                                                                                                   |
| Index ranges                                              | -44<= <i>h</i> <=44, -10<= <i>k</i> <=10, -28<= <i>l</i> <=28                                                             | -38<= <i>h</i> <=38, -10<= <i>k</i> <=10, -23<= <i>l</i> <=23                                                            |
| Reflections collected                                     | 37617                                                                                                                     | 24174                                                                                                                    |
| Data Completeness                                         | 98.7%                                                                                                                     | 99.9%                                                                                                                    |
| Data/restraints/parameters                                | 7958/0/484                                                                                                                | 3939/1/193                                                                                                               |
| Goodness-of-fit on F <sup>2</sup>                         | 1.082                                                                                                                     | 1.059                                                                                                                    |
| Weight                                                    | $w = 1/[\sigma^2(\text{Fo}^2) + (0.0151\text{P})^2 + 209.7691\text{P}]$ where $\text{P} = (\text{Fo}^2 + 2\text{Fc}^2)/3$ | $w = 1/[\sigma^2(\text{Fo}^2) + (0.0397\text{P})^2 + 18.8185\text{P}]$ where $\text{P} = (\text{Fo}^2 + 2\text{Fc}^2)/3$ |
| $R = \sum  \text{Fo} - \text{Fc}   / \sum \text{Fo} , wR$ | $R_1 = 0.0387, wR_2 = 0.0886$                                                                                             | $R_1 = 0.0368, wR_2 = 0.091$                                                                                             |

$$R_1 = \sum||\text{Fo}| - |\text{Fc}|| / \sum|\text{Fo}|, wR_2 = [\sum w(\text{Fo}^2 - \text{Fc}^2)^2 / \sum w(\text{Fo}^2)^2]^{1/2}$$



**Table S2** Summary of selected bond lengths (Å) and bond angles (°) of **1**.

| <b>Bond</b> | <b>Lengths/Å</b> | <b>Bond pair</b> | <b>Angles / °</b> |
|-------------|------------------|------------------|-------------------|
| Bi1-I1      | 3.1090 (11)      | I5-Bi1-I6        | 92.93 (3)         |
| Bi1-I2      | 3.1897 (11)      | I5-Bi1-I4        | 93.35 (4)         |
| Bi1-I3      | 3.2118 (13)      | I6-Bi1-I4        | 89.16 (2)         |
| Bi1-I4      | 3.0436 (11)      | I5-Bi1-I1        | 89.93 (4)         |
| Bi1-I5      | 2.9849 (10)      | I6-Bi1-I1        | 89.98 (2)         |
| Bi1-I6      | 2.9955 (12)      | I4-Bi1-I1        | 176.643 (19)      |
| Ag1-I7      | 2.7322 (10)      | I5-Bi1-I2        | 176.590 (18)      |
| Ag1-I2      | 3.3349 (10)      | I6-Bi1-I2        | 88.21 (3)         |
| Ag2-I5      | 3.3256 (13)      | I4-Bi1-I2        | 89.88 (3)         |
| Ag2-I8      | 2.6663 (11)      | I1-Bi1-I2        | 86.85 (3)         |
| Ag1-I7i     | 2.7322 (10)      | I5-Bi1-I3        | 93.04 (3)         |
| Ag2-I8ii    | 2.6663 (11)      | I6-Bi1-I3        | 173.657 (18)      |
| N3-C7       | 1.504 (11)       | I4-Bi1-I3        | 88.34 (2)         |
| N1-C1       | 1.494 (11)       | I1-Bi1-I3        | 92.19 (2)         |
| C8-C12      | 1.517 (12)       | I2-Bi1-I3        | 85.96 (3)         |
| C7-C8       | 1.517 (12)       | Bi1-I2-Ag1       | 163.40 (2)        |
| C8-C9       | 1.538 (13)       | Bi1-I5-Ag2       | 177.50 (2)        |
| N2-C4       | 1.493 (12)       | I7i-Ag1-I7       | 180.000 (16)      |
| N2-C5       | 1.506 (12)       | I7i-Ag1-I2       | 92.24 (3)         |
| C9-C10      | 1.509 (13)       | I7-Ag1-I2        | 87.76 (3)         |
| C1-C2       | 1.505 (12)       | I8-Ag2-I8ii      | 170.24 (6)        |
| C2-C3       | 1.515 (12)       | I8-Ag2-I5        | 93.41 (3)         |
| C2-C6       | 1.536 (12)       | I8ii-Ag2-I5      | 92.66 (3)         |
| N4-C10      | 1.504 (12)       | C10-N4-C11       | 113.5 (8)         |
| N4-C11      | 1.507 (13)       | N3-C7-C8         | 111.6 (7)         |
| C5-C6       | 1.517 (14)       | N4-C10-C9        | 110.6 (8)         |
| C11-C12     | 1.515 (14)       | N2-C5-C6         | 109.7 (8)         |
| C3-C4       | 1.512 (15)       | C12-C8-C7        | 108.2 (8)         |
|             |                  | C12-C8-C9        | 109.1 (7)         |
|             |                  | C7-C8-C9         | 113.8 (7)         |
|             |                  | C4-N2-C5         | 111.8 (7)         |
|             |                  | C10-C9-C8        | 112.4 (8)         |
|             |                  | C1-C2-C3         | 110.1 (7)         |
|             |                  | C1-C2-C6         | 112.8 (8)         |
|             |                  | C3-C2-C6         | 108.5 (8)         |
|             |                  | C11-C12-C8       | 112.3 (9)         |
|             |                  | C5-C6-C2         | 112.0 (8)         |
|             |                  | C2-C3-C4         | 112.6 (8)         |
|             |                  | N1-C1-C2         | 113.1 (7)         |
|             |                  | N4-C11-C12       | 109.6 (7)         |
|             |                  | N2-C4-C3         | 110.3 (9)         |

**Symmetry codes:** (i)  $-x + 1/2, -y + 1/2, -z + 1$ ; (ii)  $-x + 1, y, -z + 3/2$ .

**Table S3** Summary of selected bond lengths (Å) and bond angles (°) of **2**.

| Bond       | Lengths/Å   | Bond pair       | Angles / °  | Bond pair | Angles / ° |
|------------|-------------|-----------------|-------------|-----------|------------|
| Ag1-Ag1A   | 0.692 (10)  | Ag1A-Ag1-Ag1Ai  | 137 (4)     | C2-C3-N2  | 111.0 (8)  |
| Ag1-Ag1Ai  | 0.692 (10)  | Ag1Ai-Ag1-I1i   | 84.0 (15)   | N2-C3-C4  | 109.7 (7)  |
| Ag1-I1     | 2.6928 (12) | Ag1Ai-Ag1-I1    | 89.2 (14)   | C3-C4-C5  | 109.9 (9)  |
| Ag1-I1i    | 2.6928 (12) | Ag1A-Ag1-I1i    | 89.2 (14)   | C4-C5-N1  | 111.1 (9)  |
| Ag1-I2     | 3.212 (3)   | Ag1A-Ag1-I1     | 84.0 (15)   | C7-C6-N3  | 110.1 (9)  |
| Ag1-I2i    | 3.212 (3)   | Ag1Ai-Ag1-I2i   | 61.0 (19)   | C6-C7-C8  | 110.3 (8)  |
| Ag1A-Ag1Ai | 1.29 (3)    | Ag1Ai-Ag1-I2    | 162 (2)     | C9-C8-C7  | 112.7 (8)  |
| Ag1A-I1    | 2.709 (18)  | Ag1A-Ag1-I2     | 61.0 (19)   | C9-C8-N4  | 110.7 (7)  |
| Ag1A-I1i   | 2.771 (17)  | Ag1A-Ag1-I2i    | 162 (2)     | N4-C8-C7  | 108.6 (8)  |
| Ag1A-I2    | 2.94 (2)    | I1i-Ag1-I1      | 161.28 (18) | C8-C9-C10 | 109.8 (8)  |
| Ag1A-I3ii  | 3.229 (9)   | i1-Ag1-I2i      | 99.33 (6)   | N3-C10-C9 | 110.1 (9)  |
| Bi1-I2iii  | 3.0754 (8)  | I1-Ag1-I2       | 92.59 (5)   | C5-N1-C1  | 110.2 (10) |
| Bi1-I2     | 3.0754 (8)  | I1i-Ag1-I2      | 99.33 (6)   | C6-N3-C10 | 112.6 (9)  |
| Bi1-I3     | 3.0727 (8)  | I1i-Ag1-I2i     | 92.59 (5)   |           |            |
| Bi1-I3iii  | 3.0727 (8)  | I2i-Ag1-I2      | 100.81 (12) |           |            |
| Bi1-I4iii  | 3.1054 (10) | Ag1-Ag1A-Ag1Ai  | 21 (2)      |           |            |
| Bi1-I4     | 3.1054 (10) | Ag1-Ag1A-I1     | 81.3 (15)   |           |            |
| Ag1Ai-I1   | 2.771 (17)  | Ag1-Ag1A-I1i    | 76.3 (14)   |           |            |
| Ag1Aii-I3  | 3.229 (9)   | Ag1-Ag1A-I2     | 107 (2)     |           |            |
| C1-C2      | 1.511 (14)  | Ag1-Ag1A-I3ii   | 164 (2)     |           |            |
| C1-N1      | 1.532 (15)  | Ag1Ai-Ag1A-I1i  | 73.7 (15)   |           |            |
| C2-C3      | 1.504 (14)  | Ag1Ai-Ag1A-I1   | 79.1 (15)   |           |            |
| C3-C4      | 1.515 (14)  | Ag1Ai-Ag1A-I2   | 128.50 (17) |           |            |
| C3-N2      | 1.507 (12)  | Ag1Ai-Ag1A-I3ii | 142.6 (4)   |           |            |
| C4-C5      | 1.523 (14)  | I1-Ag1-I1i      | 151.7 (7)   |           |            |
| C5-N1      | 1.530 (14)  | I1i-Ag1-I2      | 104.4 (6)   |           |            |
| C6-C7      | 1.509 (14)  | I1-Ag1A-I2      | 98.6 (6)    |           |            |
| C6-N3      | 1.514 (15)  | I1-Ag1A-I3ii    | 100.5 (4)   |           |            |
| C7-C8      | 1.534 (14)  | I1i-Ag1A-I3ii   | 96.4 (4)    |           |            |
| C8-C9      | 1.495 (13)  | I2-Ag1A-I3ii    | 88.8 (4)    |           |            |
| C8-N4      | 1.518 (12)  | I2iii-Bi1-I2    | 180.0       |           |            |
| C9-C10     | 1.524 (13)  | I2-Bi1-I4       | 87.35 (2)   |           |            |
| C10-N3     | 1.522 (14)  | I2iii-Bi1-I4    | 92.65 (2)   |           |            |

**Symmetry codes:** (i)  $-x + 1, y, -z + 1/2$ ; (ii)  $-x + 1, -y + 1, -z + 1$ ; (iii)  $-x + 1, -y, -z + 1$

**Table S4** Hydrogen bonding data of compound 1

| D-H    | d(D-H) | d(H..A) | <DHA   | d(D..A) | A     |
|--------|--------|---------|--------|---------|-------|
| O1-H1F | 0.850  | 2.727   | 172.73 | 3.572   | I4(a) |
| O1-H1G | 0.850  | 2.322   | 124.17 | 2.886   | N2    |
| O1-H1G | 0.850  | 3.211   | 127.54 | 3.790   | I5(b) |
| O1-H1G | 0.850  | 3.326   | 117.14 | 3.790   | I5(c) |
| N3-H3A | 0.890  | 2.718   | 162.72 | 3.577   | I7(d) |
| N3-H3B | 0.890  | 2.699   | 161.91 | 3.556   | I3    |
| N3-H3C | 0.890  | 2.910   | 136.99 | 3.612   | I2    |
| N3-H3C | 0.890  | 3.223   | 114.41 | 3.681   | I1    |
| N1-H1A | 0.890  | 2.747   | 165.20 | 3.615   | I7(e) |
| N1-H1B | 0.890  | 2.804   | 174.55 | 3.691   | I3    |
| N1-H1C | 0.890  | 3.027   | 134.82 | 3.709   | I1(f) |
| N1-H1C | 0.890  | 3.175   | 114.49 | 3.635   | I4    |
| N2-H2A | 0.900  | 2.778   | 177.22 | 3.677   | I8(g) |
| N2-H2B | 0.900  | 2.035   | 157.37 | 2.886   | O1    |
| N2-H2B | 0.900  | 3.319   | 113.08 | 3.764   | I5(h) |
| N4-H4A | 0.900  | 2.777   | 160.86 | 3.639   | I6(i) |
| N4-H4B | 0.900  | 2.873   | 145.22 | 3.649   | I1(j) |

**Symmetry transformations used to generate equivalent atoms** : (a) [ -x + 1, -y + 1, -z + 1 ]; (b) [ -x + 1, -y + 1, -z + 1 ]; (c) [ x, -y + 1, z - 1/2 ]; (d) [ -x + 1/2, -y + 3/2, -z + 1 ]; (e) [ -x + 1/2, -y + 1/2, -z + 1 ]; (f) [ x, y - 1, z ]; (g) [ x, -y + 1, z - 1/2 ]; (h) [ -x + 1, -y + 1, -z + 1 ]; (i) [ x, -y + 1, z - 1/2 ]; (j) [ x, -y + 2, z - 1/2 ]

**Table S5** Hydrogen bonding data of compound 2

| D-H    | d(D-H) | d(H..A) | <DHA   | d(D..A) | A     |
|--------|--------|---------|--------|---------|-------|
| N2-H2C | 0.910  | 2.908   | 133.40 | 3.594   | I3(a) |
| N2-H2C | 0.910  | 3.195   | 119.89 | 3.733   | I3(b) |
| N2-H2D | 0.910  | 2.717   | 171.01 | 3.618   | I1    |
| N2-H2E | 0.910  | 2.791   | 167.04 | 3.684   | I4(c) |
| N4-H4C | 0.910  | 2.972   | 156.78 | 3.825   | I1(d) |
| N4-H4C | 0.910  | 3.306   | 116.12 | 3.796   | I2(e) |
| N4-H4D | 0.910  | 2.918   | 161.07 | 3.790   | I4(f) |
| N4-H4E | 0.910  | 1.979   | 167.84 | 2.875   | O1    |
| O1-H1C | 0.850  | 2.696   | 167.82 | 3.532   | I3    |
| O1-H1D | 0.850  | 2.154   | 142.38 | 2.875   | N4(g) |

**Symmetry transformations used to generate equivalent atoms** : (a) [ x, -y + 1, z - 1/2 ]; (b) [ -x + 1, y, -z + 1/2 ]; (c) [ -x + 1, y, -z + 1/2 ]; (d) [ -x + 1, -y, -z + 1 ]; (e) [ -x + 1, -y, -z + 1 ]; (f) [ x, -y, z + 1/2 ]; (g) [ -x + 1, y, -z + 3/2 ]

**Table S6** Comparison of the decay life time data of title compounds and the reported ones.

| Compounds                                                           | ( $\lambda_{exc}$ , $\lambda_{em}$ ) | Decay times<br>(average) | Ref       |
|---------------------------------------------------------------------|--------------------------------------|--------------------------|-----------|
| (BZA) <sub>2</sub> PbBr <sub>4</sub>                                | 320, 406/426                         | 0.71                     | [7]       |
| Ea <sub>4</sub> Pb <sub>3</sub> Cl <sub>10</sub>                    | 375, 500                             | 1.77                     | [8]       |
| Epz PbBr <sub>4</sub>                                               | 330, 596                             | 2.7                      | [9]       |
| MAPbI <sub>3</sub>                                                  | 470, 550                             | 2.85                     | [10]      |
| (HA) <sub>2</sub> (MA) <sub>2</sub> Pb <sub>3</sub> I <sub>10</sub> | 470, 600                             | 3.61                     | [10]      |
| (BZA) <sub>2</sub> PbBr <sub>0.5</sub> Cl <sub>3.5</sub>            | 320, 406/500                         | 4.17                     | [7]       |
| <b>1</b>                                                            | 450, 605                             | 5.97                     | This work |
| <b>2</b>                                                            | 450, 587                             | 6.23                     | This work |

**Table S7** The comparison of proton conductivities of the title compounds and the reported related crystalline materials

| Compound                                                                                                      | Measurement<br>conditions | $\sigma$ (S cm <sup>-1</sup> ) | Ref       |
|---------------------------------------------------------------------------------------------------------------|---------------------------|--------------------------------|-----------|
| {[Co <sub>3</sub> (p-ClPnHIDC) <sub>3</sub> (H <sub>2</sub> O) <sub>3</sub> ]·6H <sub>2</sub> O} <sub>n</sub> | 100 °C, 93%RH             | 1.47 × 10 <sup>-4</sup>        | [11]      |
| [Triethylpropylammonium][PbI <sub>3</sub> ]                                                                   | 200 °C, 0% RH             | 4.47 × 10 <sup>-5</sup>        | [12]      |
| {[Co <sub>3</sub> (m-ClPhIDC) <sub>2</sub> (H <sub>2</sub> O) <sub>6</sub> ]·2H <sub>2</sub> O} <sub>n</sub>  | 100 °C, 98%RH             | 7.62 × 10 <sup>-4</sup>        | [11]      |
| [C <sub>5</sub> H <sub>9</sub> NH <sub>3</sub> ] <sub>4</sub> CdBr <sub>6</sub>                               | 100°C, 0%RH               | 4.23 × 10 <sup>-7</sup>        | [13]      |
| (C <sub>6</sub> H <sub>13</sub> N) <sub>2</sub> BiI <sub>5</sub>                                              | 140°C, 0%RH               | 4.18 × 10 <sup>-6</sup>        | [14]      |
| Zn(H <sub>2</sub> PO <sub>4</sub> ) <sub>2</sub> (124triH) <sub>2</sub>                                       | 150°C, 0%RH               | 1.2 × 10 <sup>-4</sup>         | [15]      |
| (Mo <sub>5</sub> P <sub>2</sub> O <sub>23</sub> )[Cu(phen)(H <sub>2</sub> O)] <sub>33</sub> 5H <sub>2</sub> O | 28°C, 98%RH               | 2.2 × 10 <sup>-5</sup>         | [16]      |
| <b>1</b>                                                                                                      | 95°C, 90%RH               | 2.27 × 10 <sup>-4</sup>        | This work |
| <b>2</b>                                                                                                      | 95°C, 90%RH               | 2.09 × 10 <sup>-4</sup>        | This work |

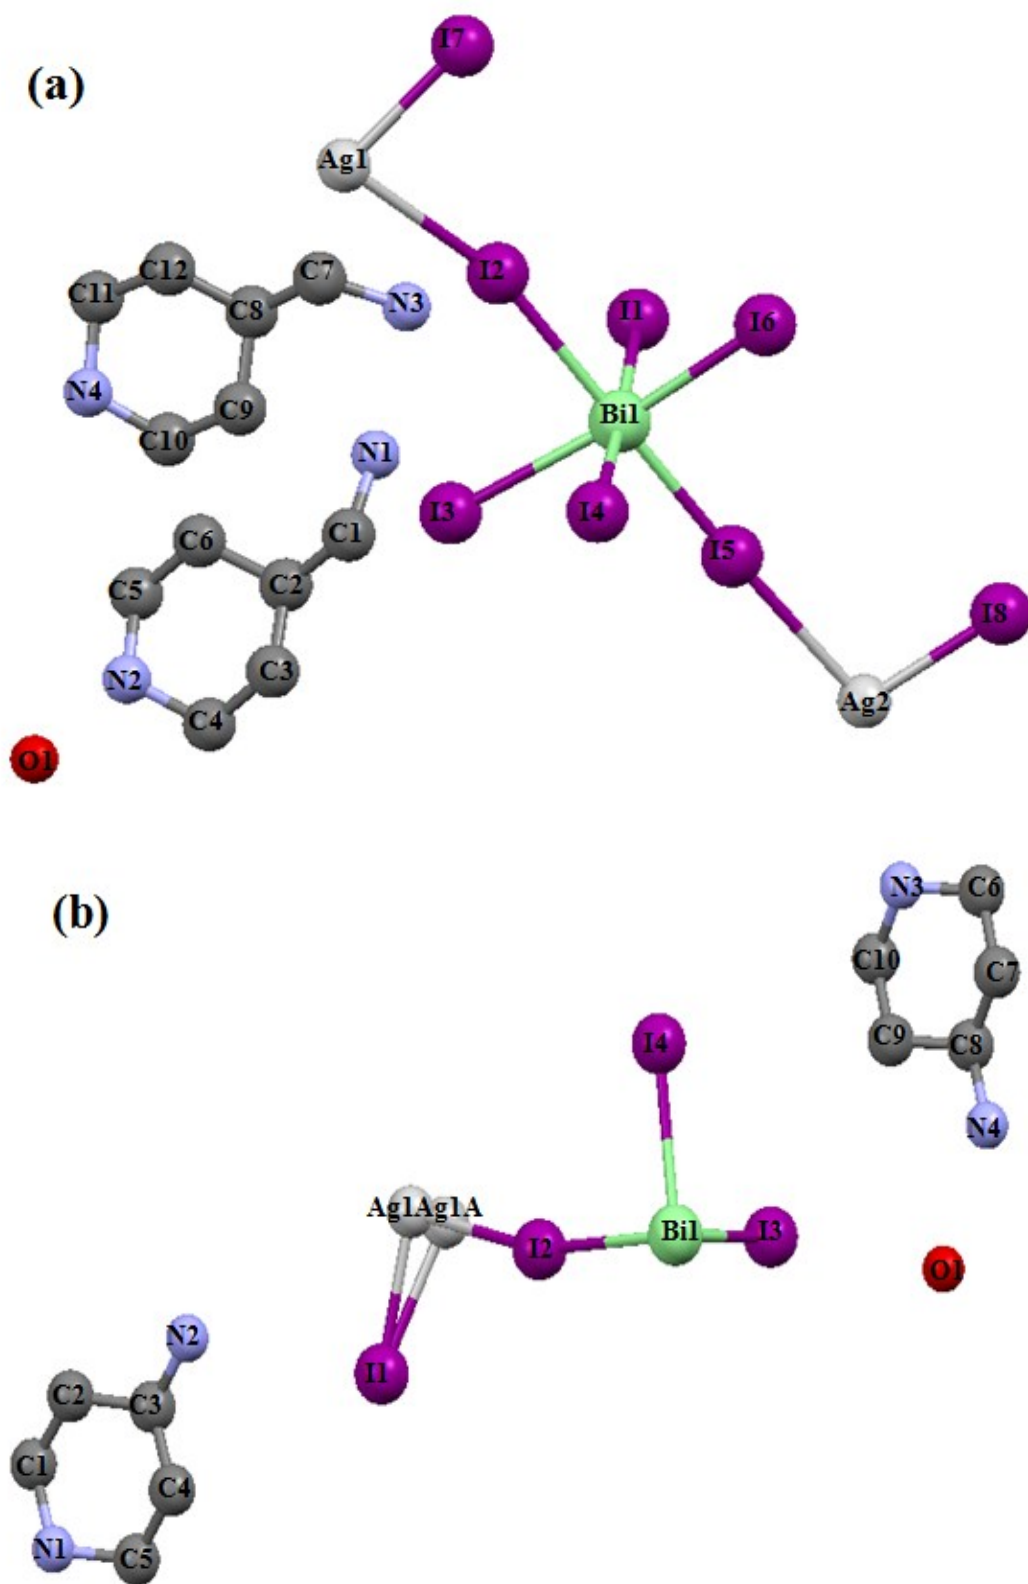

**Figure S1.** (a) Assymmetric unit of **1**. (b) Assymmetric unit of **2** (hydrogen atoms are omitted for the clarification).

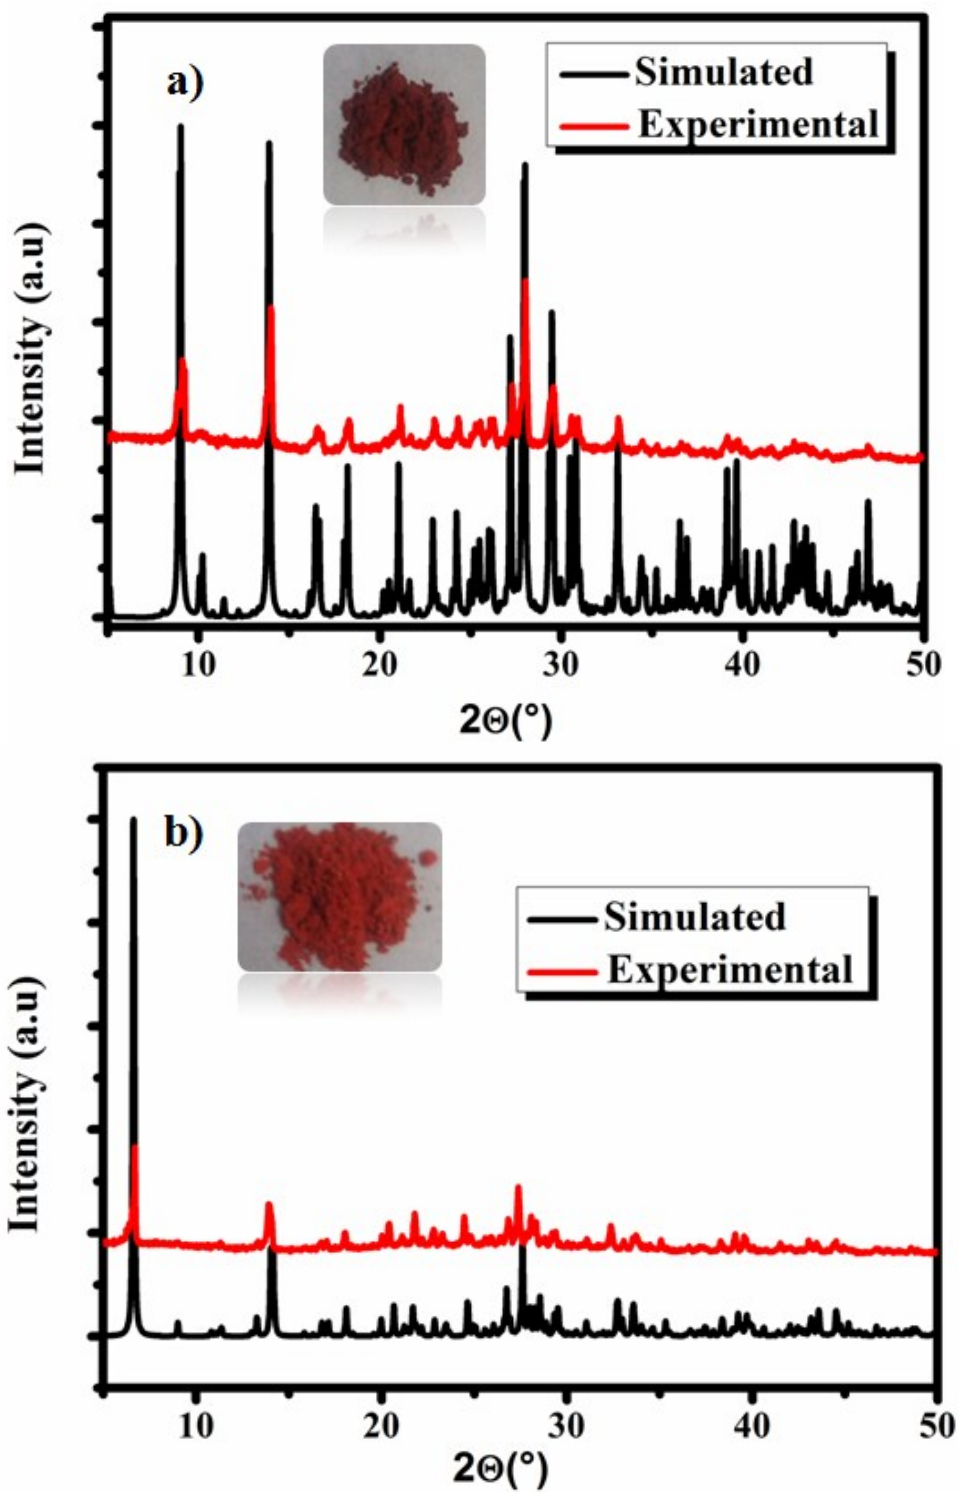

**Figure S2.** (a) Powder XRD patterns of **1**. Inset: photograph of the Powder. (b) Powder XRD patterns of **2**. Inset: photograph of the Powder.

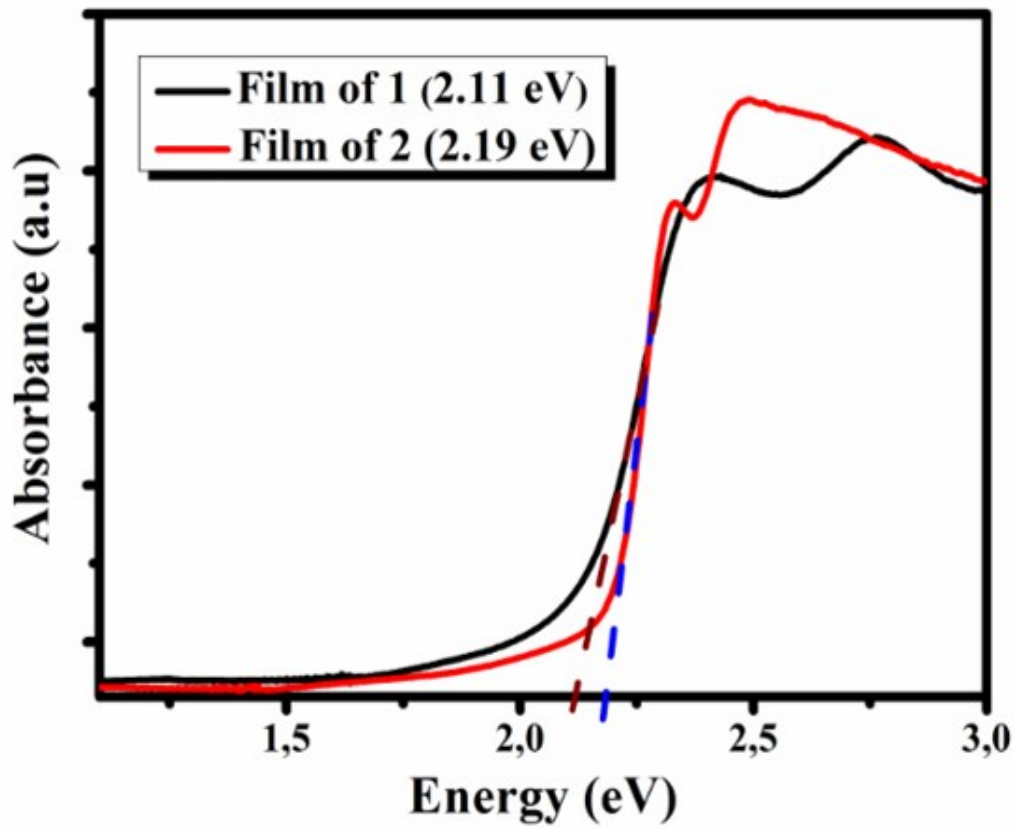

Figure S3. (a) Absorption spectra for film 1 and 2.

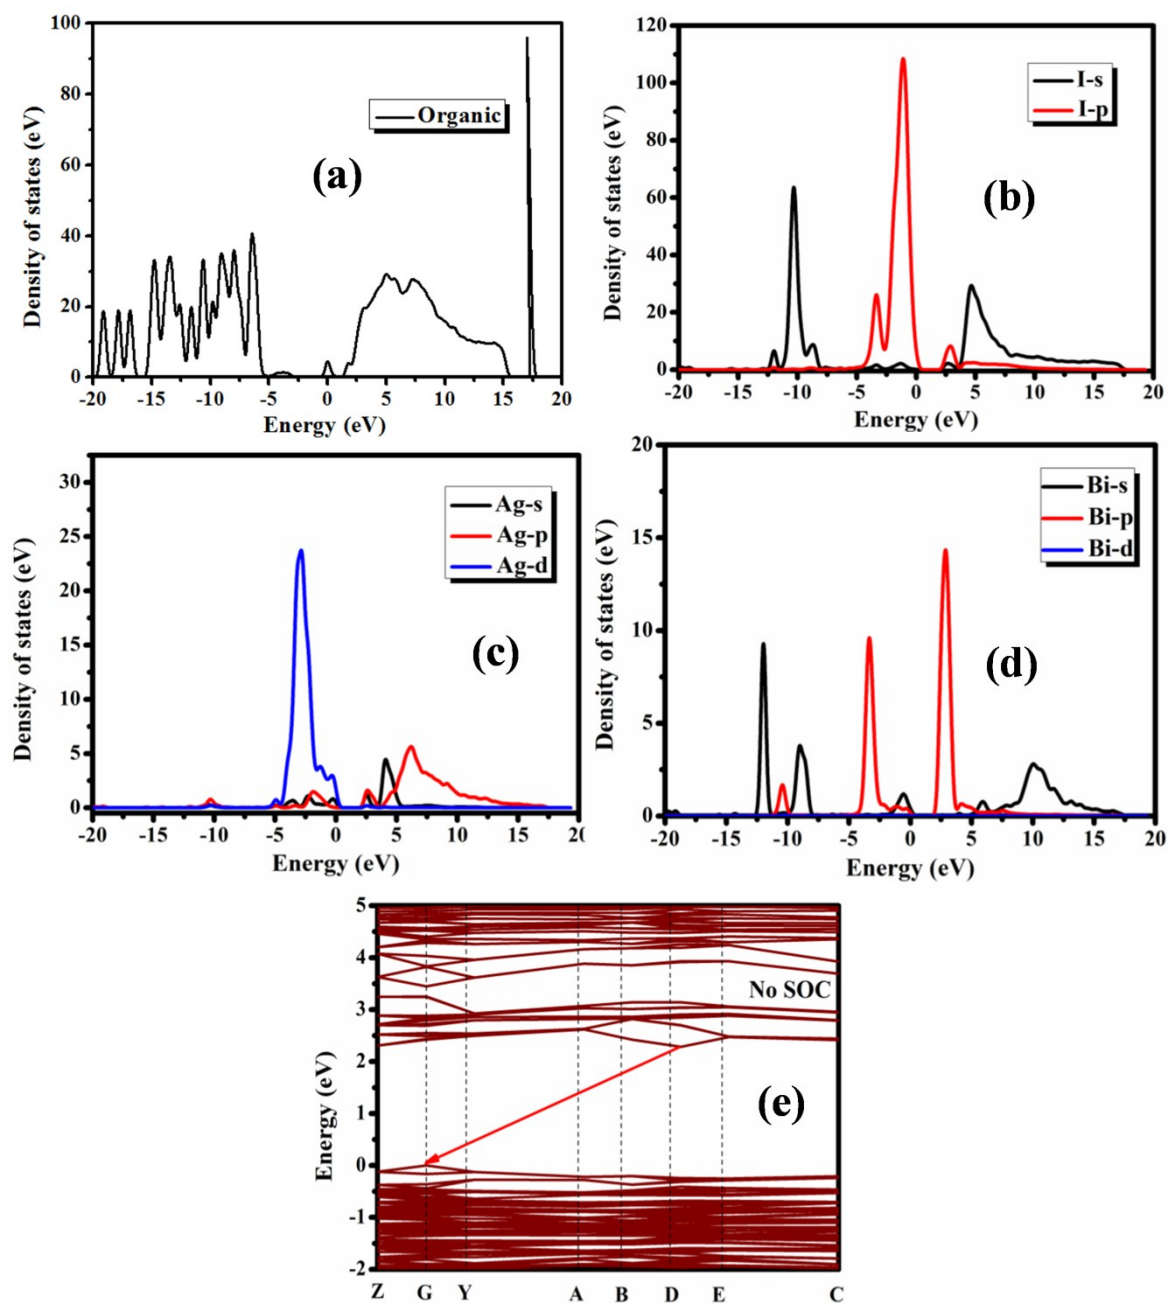

**Figure S4.** (a-d) Partial density of states (PDOS) of compound **1** (organic part, I-s, I-p, Ag-s, Ag-p, Ag-d, Bi-s, Bi-p and Bi-d). (e) The band structure of **AgBiI** without SOC.



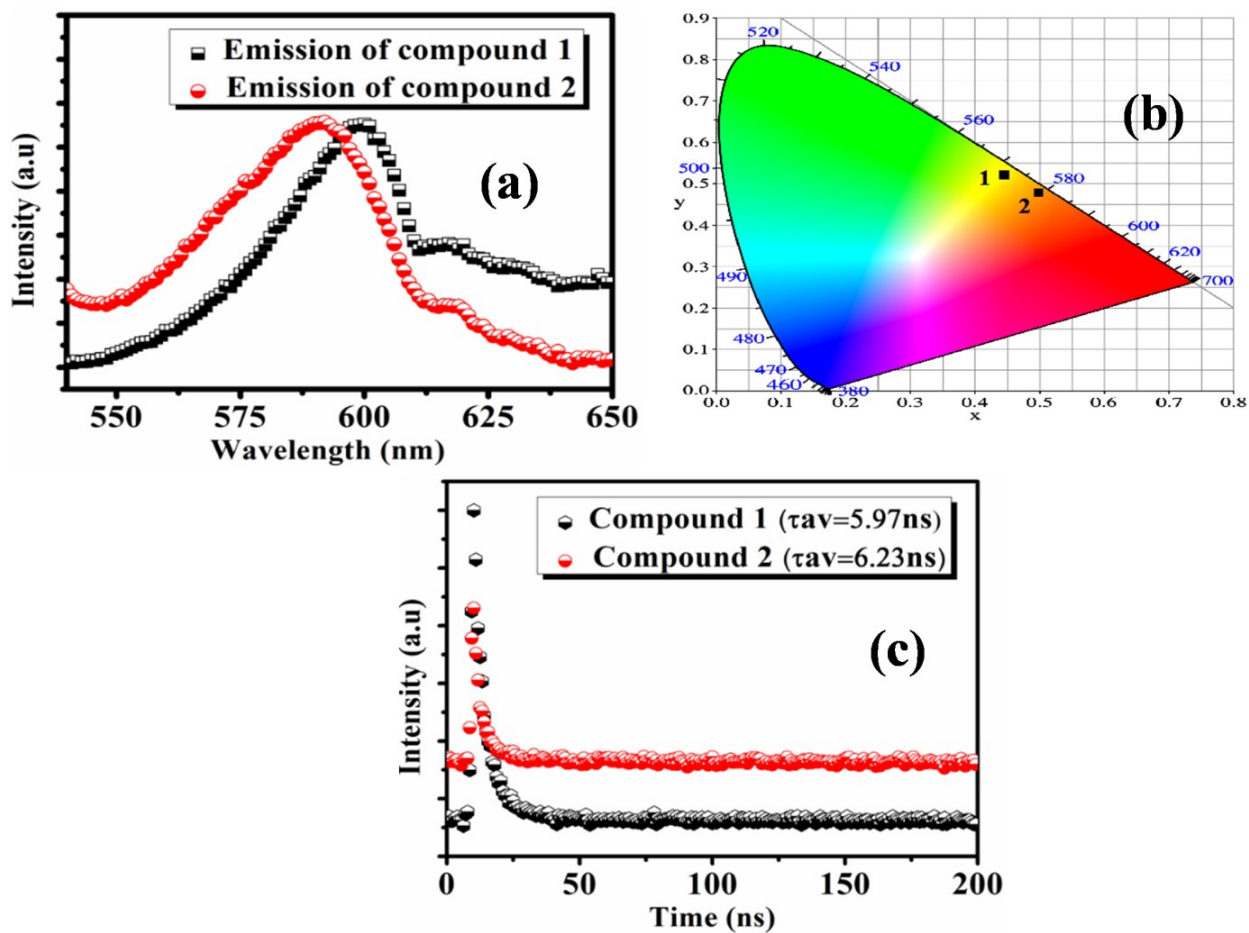

**Figure S5.** (a) The steady-state room-temperature photoluminescence (PL) spectra of **1** and **2**. (b) CIE1931 diagram chromatic coordinates of **1** and **2** upon 450 nm excitation. (c) The fluorescence decay time spectrum of compound **1** and **2**.

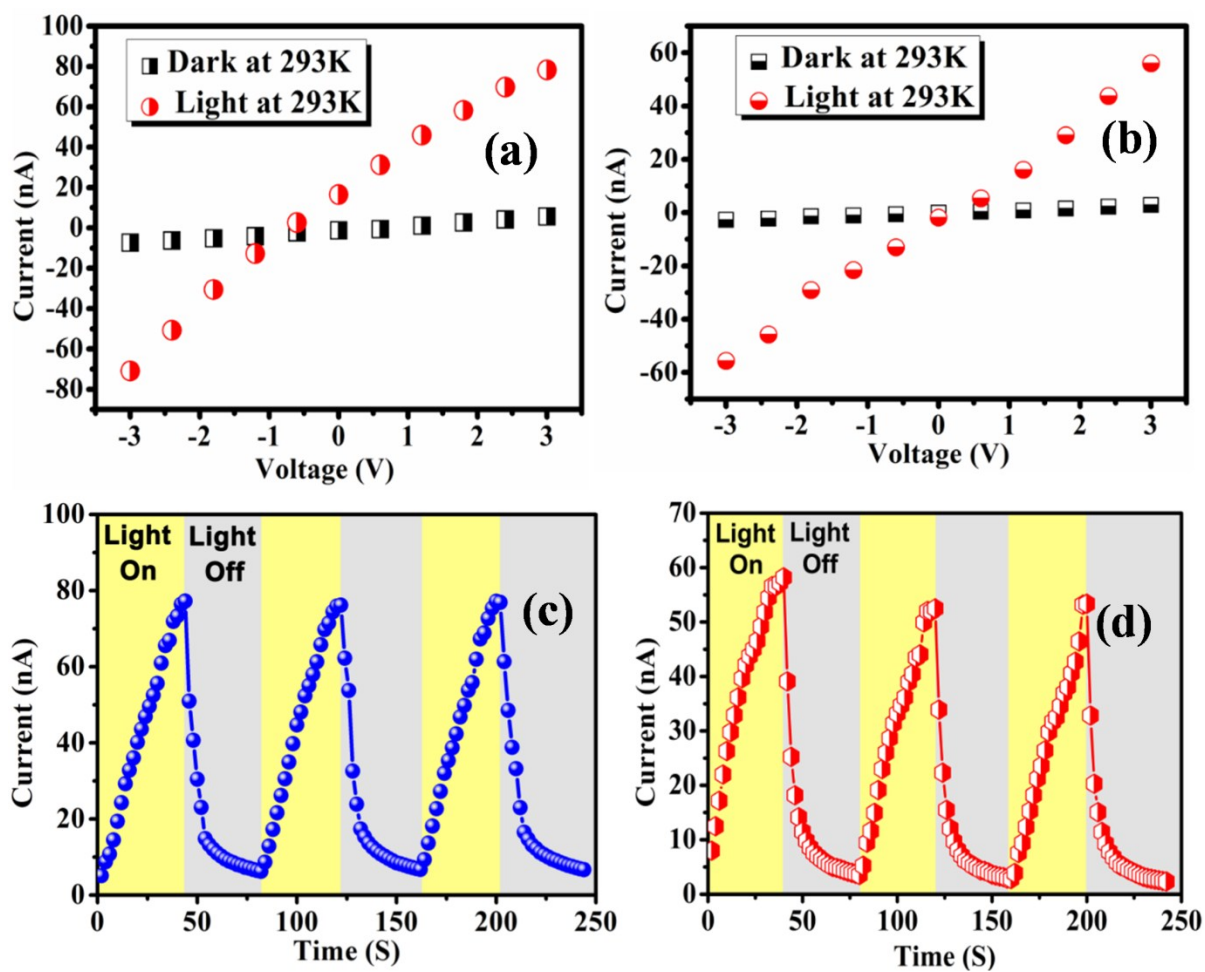

**Figure S6.** (a, b) I–V plots for dark and light current of **1** (a) and **2** (b) measured at 293 K under a 350 W Xenon lamp. (c, d) I–t plots of several irradiation cycles of **1** (c) and **2** (d).

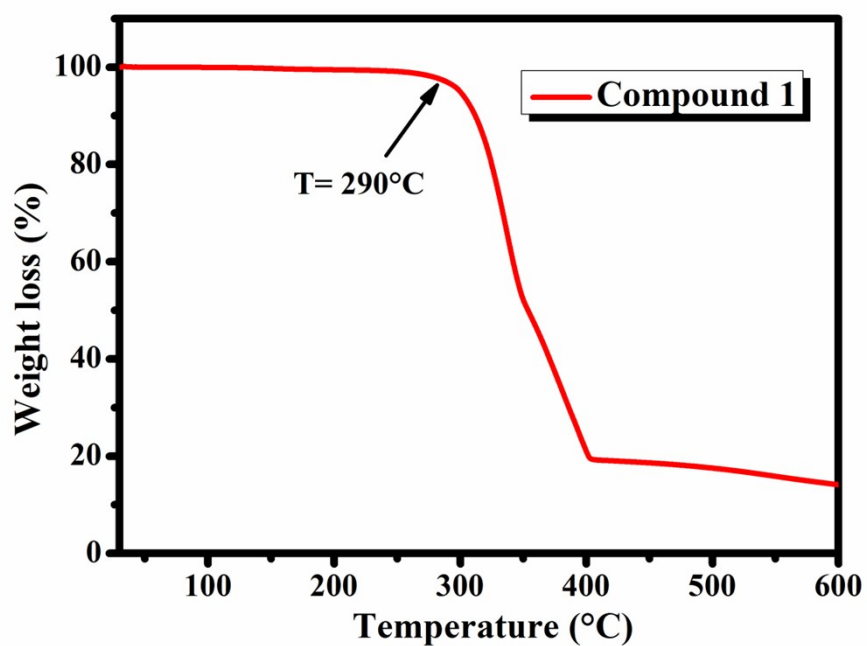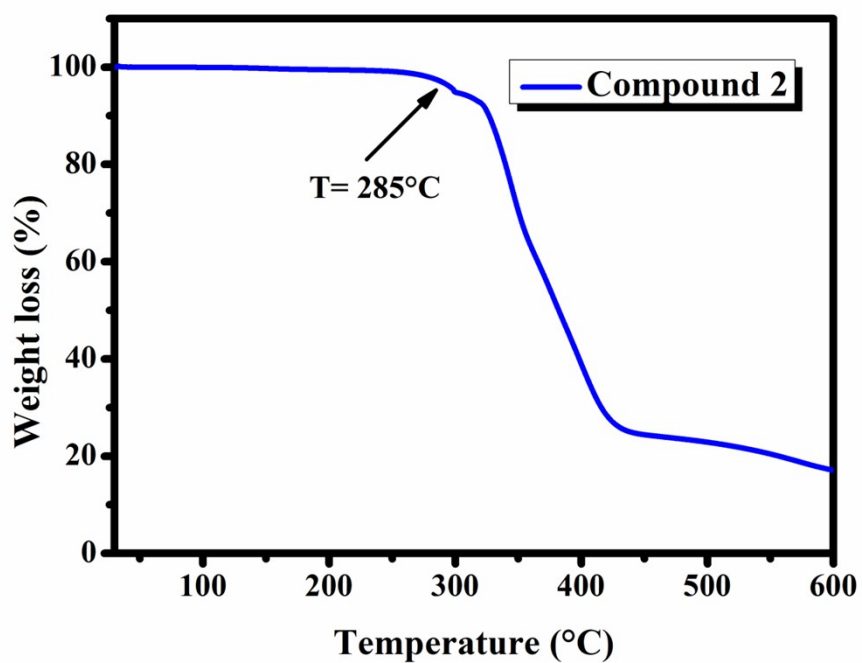

Figure S7. TGA curves of 1 and 2

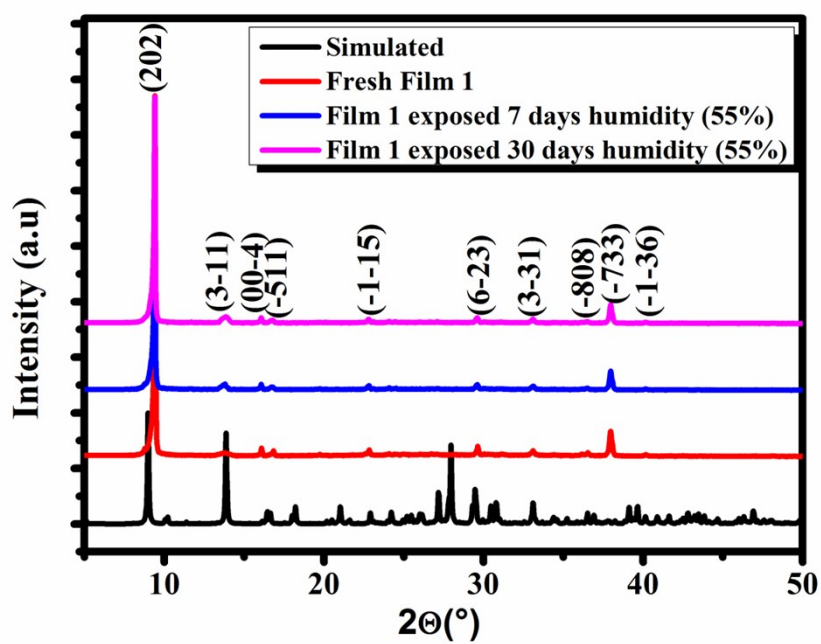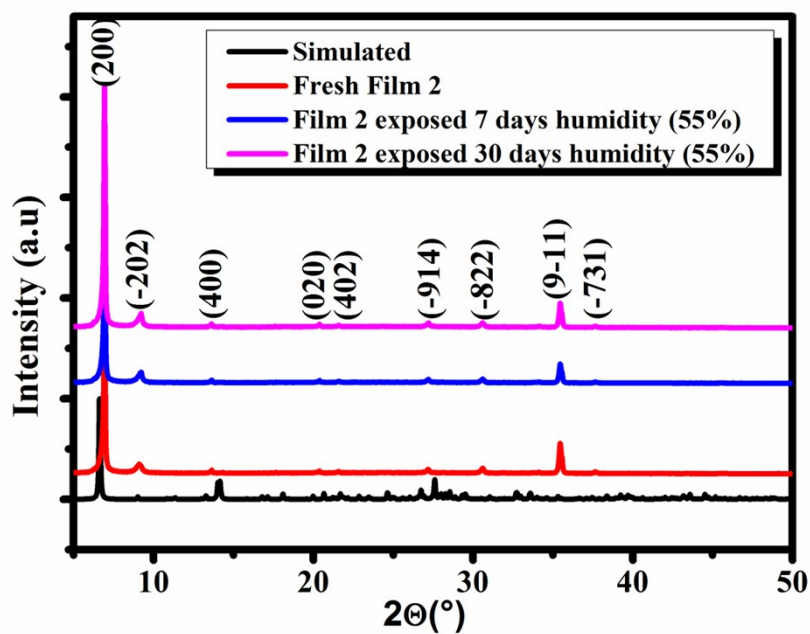

**Figure S8.** Stability of 1 and 2 towards humidity showing XRD Thin Films of 1 and 2 before and after exposure to 55% relative humidity and 25 °C at different times.

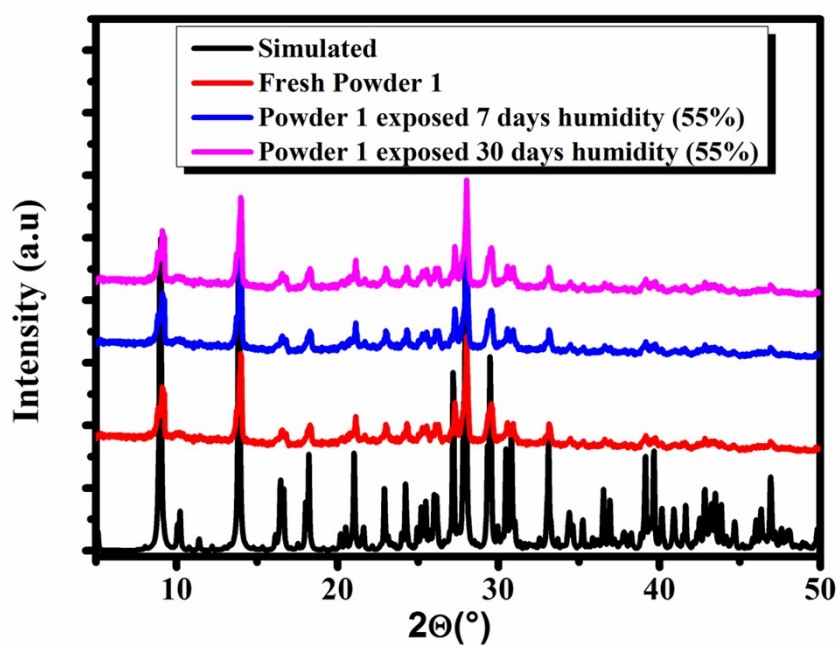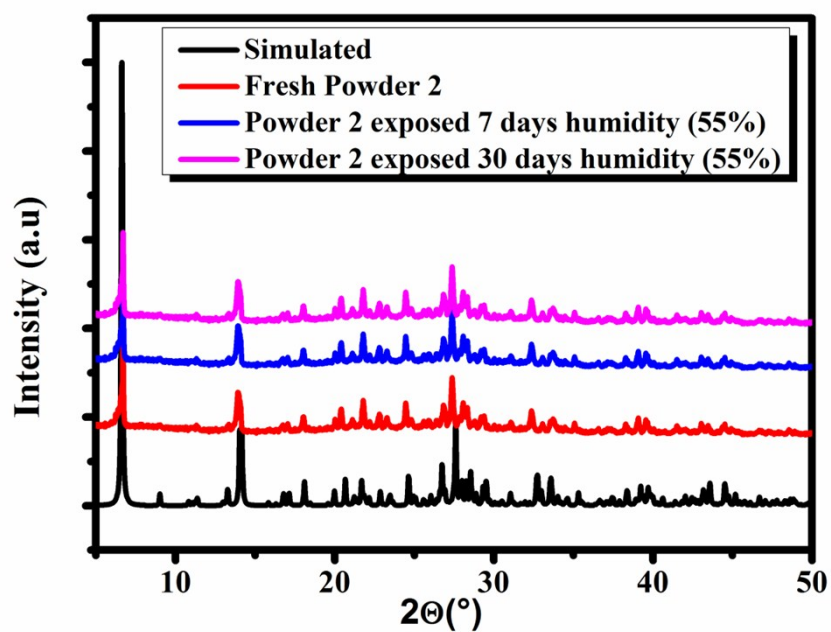

**Figure S9.** Stability of 1 and 2 towards humidity showing PXR D of 1 and 2 before and after exposure to 55% relative humidity and 25 °C at different times

## References :

- [1] G. M. Sheldrick, *Acta Crystallogr. A.*, **2008**, 64, 112-122.
- [2] M. C. Payne, M. P. Teter, D. C. Allan, T. A. Arias, J. D. Joannopoulos, *Rev. Mod. Phys.*, **1992**, 64, 1045-1097.
- [3] S. J. Clark, M. D. Segall, C. J. Pickard, P. J. Hasnip, M. J. Probert, K. Refson, M. C. Payne, *Z. Kristallogr. - Cryst. Mater.*, **2005**, 220, 567-667.
- [4] J.P. Perdew, A. Zunger, *Phys. Rev. B.* **1981**, 23, 5048–5079.
- [5] A. M. Rappe, K. M. Rabe, E. Kaxiras, J. D. Joannopoulos, *Phys. Rev. B: Condens. Matter Mater. Phys.*, **1990**, 41, 1227-1230.
- [6] L. Kleinman, D. M. Bylander, *Phys. Rev. Lett.* **1982**, 48, 1425-1428.
- [7] M-H. Jung, *Inorg. Chem.* **2019**, 58, 6748–6757.
- [8] L. Mao, Y. Wu, C. C. Stoumpos, B. Traore, C. Katan, J. Even, M. R. Wasielewski, and M. G. Kanatzidis, *J. Am. Chem. Soc.*, **2017**, 139, 11956–11963.
- [9] L. Mao, P. Guo, M. Kepenekian, I. Hadar, C. Katan, J. acky Even, R. D. Schaller, C.C. Stoumpos, and M.G. Kanatzidis, *J. Am. Chem. Soc.*, **2018**, 140, 13078–13088.
- [10] Jung, H. Mi-Hee, *J. Mater. Chem. A.*, **2019**, 7,14689.
- [11] X. Liang , B. Li , M. H. Wang , J. Wang , R. L. Liu, and G. Li , *ACS Appl. Mater. Interfaces.*, **2017**, 9 , 25082 -25086.
- [12] M. J. Wang , X. R. Chen , Y. B. Tong , G. J. Yuan , X. M. Ren, and J. L. Liu , *Inorg. Chem.*, **2017**, 56, 9525 -9534
- [13] S. Wang, L. Li, Z. Sun, C. Ji, S. Liu, Z. Wu, S. Zhao, A. Zeb, M. Hong, and J. Luo, *J. Mater. Chem. C.*, **2017**, 5, 4731-4735.
- [14] W. Zhang, K. Tao, C. Ji, Z. Sun, S. Han, J. Zhang, Z. Wu, and J. Luo, *Inorg. Chem.*, **2018**, 578, 4239-4243.
- [15] D. Umeyama, S. Horike, M. Inukai, T. Itakura, S. Kitagawa, *J. Am. Chem. Soc.*, **2012**, 134, 12780–12785.
- [16] C. Dey, T. Kundu, R. Banerjee, *Chem. Commun.*, **2012**, 48, 266–268.
